# Supplementary material for: Differential Accumulation of Anthocyanins in Dendrobium officinale Stems with Red and Green Peels
Source: PubMed Central journal article supplement (PMC6212978; doi:10.3390/ijms19102857), 2018-09-20
Supplement: ijms-19-02857-s001.pdf [file ijms-19-02857-s001.pdf]

## SUPPLEMENTARY INFORMATION

### Differential accumulation of anthocyanins in *Dendrobium officinale* stems with red and green peels

Zhenming Yu <sup>1,†</sup>, Yinyin Liao <sup>1,2,†</sup>, Jaime A. Teixeira da Silva <sup>3</sup>, Ziyin Yang <sup>1,2</sup>, Jun Duan <sup>1,2,\*</sup>

<sup>1</sup> Guangdong Provincial Key Laboratory of Applied Botany & Key Laboratory of South China Agricultural Plant Molecular Analysis and Genetic Improvement, South China Botanical Garden, Chinese Academy of Sciences, Xingke Road 723, Tianhe District, Guangzhou 510650, China; zhenming311@scbg.ac.cn (Z.Y.); honey\_yyliao@scbg.ac.cn (Y.L.); zyyang@scib.ac.cn (Z.Y.)

<sup>2</sup> University of Chinese Academy of Sciences, No. 19A Yuquan Road, Beijing 100049, China

<sup>3</sup> P. O. Box 7, Miki-cho post office, Ikenobe 3011-2, Kagawa-ken, 761-0799, Japan; jaimetex@yahoo.com (J.T.)

† These authors contributed equally to this work.

\* Correspondence: duanj@scib.ac.cn; Tel./Fax: +86-20-38072978

### Materials and methods

#### 1. Assessment of total flavonoids, anthocyanins and carotenoids in *D. officinale* stems

Total carotenoid content was determined according to previous reference [1,2]. Carotenoids were released from *D. officinale* stems (2.0 g) by cold 80% acetone, homogenized in the dark, and centrifuged at 10000×g for 10 min. The resulting supernatant was spectrophotometrically assayed at 470, 646, and 663 nm with an UV-6000 spectrophotometer (Shanghai Metash Instruments Co., Shanghai, China). Total carotenoid content (μg/g) was quantified according to the following equations:

Chlorophyll *a* = 12.21×A<sub>663nm</sub>−2.81×A<sub>646nm</sub>;

Chlorophyll *b* = 20.13×A<sub>646nm</sub>−5.03×A<sub>663nm</sub>;

Carotenoids = (1000×A<sub>470nm</sub>−3.27×chlorophyll *a*−104×chlorophyll *b*)/229.

#### 2. Compositional analysis of flavonoid and anthocyanin with UPLC-QTOF-MS

Compositional analysis used the reported protocol [3]. *D. officinale* green and red stems were pulverized into a fine powder with liquid nitrogen using a mortar and pestle. Powdered sample (1.0 g) was accurately weighed, exhaustively extracted by vortexing with 4 mL of 70 % aqueous methanol (containing 0.1 % formic acid) for 1 min, and followed by a 40 Hz ultrasonic extraction (SB-5200D, Ningbo Scientz Biotechnology Co., Ningbo, China) in ice-cold water for 30 min. The mixture was centrifuged at 10000×g for 10 min and the supernatant was subjected to UPLC-QTOF-MS analysis. “Extracts were analyzed at 40 °C using the Waters ACQUITY UPLC System (Waters Corp., Milford, MA, USA) equipped with an ACQUITY UPLC HSS T3 column (100 Å, 2.1×100 mm, 1.8 μm, Waters, Corp., USA).” Flavonoids were detected at 350 nm while anthocyanins were determined at 520 nm. Each flavonoid or anthocyanin was quantified based on absolute peak area. The mobile phase consisted of aqueous formic acid (0.1 % in ultra-pure water, solvent A) and formic acid in acetonitrile (0.1 %, v/v, solvent B). The initial condition was 90 % solvent A and 10 % solvent B. “The following linear gradient elution was performed: 0-12 min, 10-14 % B; 12-17 min, 14-20 % B; 17-25 min, 20-30 % B; 25-25.1 min, 30-90 % B; 25.1-30.1 min, 90 % B.” The flow rate and injection volume were set at 0.3 ml/min and 5 μl, respectively. Mass spectrometry was performed with a Xevo G2-XS QTOF (Waters MS Technologies, Manchester, UK) equipped with an electrospray ionization source and controlled by MassLynx software version 4.1 (Waters Corp., Milford, MA, USA). “Full MS scan was carried out in the range of *m/z* 100-1500 Da at a scan time of 0.5 s.” Cone voltage and capillary voltage were set at 40 V and 2500 V, respectively. De-solvation temperature and source temperature were 350 °C and 100 °C, respectively. Nebulizer and de-solvation gas were nitrogen. The flow rates of cone and de-solvation gas were 50 L/h and 650 L/h, respectively. “The low energy was set as 6 V, and high energy increased from 20 V to 35 V.” Leucine enkephalin (2 ng/μl, Sigma-Aldrich, St. Louis, MO, USA) was used as the lock mass, with *m/z* 554.2615 for the negative mode and *m/z* 556.2766 for the positive mode.

**Table S1 UPLC-QTOF-MS identification of flavonoid compounds identified from pooled *D. officinale* green and red stems.**

| Adducts   | <i>m/z</i> | Retention time (min) | Max fold change | Accepted Description                                                                                                  | Formula                                                       |
|-----------|------------|----------------------|-----------------|-----------------------------------------------------------------------------------------------------------------------|---------------------------------------------------------------|
| M+H       | 281.08     | 0.61                 | 2.52            | 5-Hydroxy-2-[(2R,3S)-3-phenyl-2-oxiranyl]-4H-chromen-4-one                                                            | C <sub>17</sub> H <sub>12</sub> O <sub>4</sub>                |
| M+Na      | 421.11     | 5.46                 | 56.84           | 4- <i>O</i> -sinapoylquinic acid                                                                                      | C <sub>18</sub> H <sub>22</sub> O <sub>10</sub>               |
| M+Na      | 483.15     | 5.46                 | 84.64           | Paeonolide                                                                                                            | C <sub>20</sub> H <sub>28</sub> O <sub>12</sub>               |
| M+H, M+Na | 381.24     | 14.32                | 2.79            | 16-Butyl-3-methoxy-estra-1,3,5(10)-triene-16-β,17-β-diol                                                              | C <sub>23</sub> H <sub>34</sub> O <sub>3</sub>                |
| M+H, M+Na | 395.26     | 17.25                | 3.69            | Cervonoyl ethanolamide                                                                                                | C <sub>24</sub> H <sub>36</sub> O <sub>3</sub>                |
| M+H, M+Na | 363.26     | 20.42                | 3.01            | 12-[(Cyclohexylcarbamoyl)amino] dodecanoic acid                                                                       | C <sub>19</sub> H <sub>36</sub> N <sub>2</sub> O <sub>3</sub> |
| M-H, M+Cl | 359.11     | 2.63                 | 3.54            | Acalyphin                                                                                                             | C <sub>14</sub> H <sub>20</sub> N <sub>2</sub> O <sub>9</sub> |
| M-H       | 623.16     | 4.55                 | 12.41           | Chrysoeriol 7- <i>O</i> -gentiobioside                                                                                | C <sub>28</sub> H <sub>32</sub> O <sub>16</sub>               |
| M-H       | 563.14     | 4.71                 | 3.65            | 7- <i>O</i> -[β-D-arabinopyranosyl-(1→6)-β-D-glucosyl] apigenin                                                       | C <sub>26</sub> H <sub>28</sub> O <sub>14</sub>               |
| M-H       | 595.16     | 4.73                 | 11.89           | Butrin                                                                                                                | C <sub>27</sub> H <sub>32</sub> O <sub>15</sub>               |
| M-H       | 593.15     | 4.95                 | 3.35            | Genistin 7- <i>O</i> -gentiobioside                                                                                   | C <sub>27</sub> H <sub>30</sub> O <sub>15</sub>               |
| M-H       | 563.14     | 5.18                 | 3.99            | 6- <i>O</i> -β-D-glucopyranosyl-β-D-glucopyranoside                                                                   | C <sub>26</sub> H <sub>28</sub> O <sub>14</sub>               |
| M-H       | 577.16     | 5.46                 | 13.34           | 7- <i>O</i> -[β-D-arabinopyranosyl-(1→6)-β-D-glucosyl]apigenin                                                        | C <sub>27</sub> H <sub>30</sub> O <sub>14</sub>               |
| M-H       | 577.16     | 5.46                 | 13.34           | 1,3,6-trihydroxy-2-methyl-9,10-anthraquinone-3- <i>O</i> -α-L-rhamnopyranosyl-(1→2)-β-D-glucopyranoside               | C <sub>27</sub> H <sub>30</sub> O <sub>14</sub>               |
| M-H       | 565.19     | 5.59                 | 2.51            | 3-(β-D-Glucopyranosyloxy)-5-[( <i>Z</i> )-2-(4-methoxyphenyl)vinyl]phenyl β-D-glucopyranoside                         | C <sub>27</sub> H <sub>34</sub> O <sub>13</sub>               |
| M-H       | 607.16     | 5.81                 | 348.34          | 5,7-Dihydroxy-2-(4-methoxyphenyl)-4-oxo-4H-chromen-3-yl 6- <i>O</i> -(6-deoxy-α-L-mannopyranosyl)-β-D-glucopyranoside | C <sub>28</sub> H <sub>32</sub> O <sub>15</sub>               |
| M-H, M+Cl | 581.22     | 5.98                 | 39.11           | (-)-Lyoniresinol-3-α- <i>O</i> -β-glucopyranoside                                                                     | C <sub>28</sub> H <sub>38</sub> O <sub>13</sub>               |

**Table S2 Primers used for quantitative real-time PCR (qRT-PCR) analysis in this study.**

| Gene | Gene ID        | Forward (5'→3')         | Reverse (5'→3')         |
|------|----------------|-------------------------|-------------------------|
| PAL1 | Unigene0108630 | CTACATGAAGGTGGCGAAGAA   | CTTGTTGCTGCACGAATTAC    |
| PAL2 | Unigene0016044 | GGTTTCAAGGGAGCAGAGATAG  | CGCTCTGCACATGGTTAGT     |
| PAL3 | Unigene0158609 | TACCTTGTCGGAATGCTCAC    | CTCCCATCCGAGATGAGATAGA  |
| PAL4 | Unigene0103006 | TTCGCTGCAGTCAGAACTC     | GACTAGGCATTATTCGGGTCAA  |
| C4H1 | Unigene0158049 | CAACTCCTCCCTCCAATCATTTA | GGGCAGTTCAGTCTCCATATAC  |
| C4H2 | Unigene0083313 | CCAGTTTCTTCTCTCCTCAAC   | TACGGCGATTTTCATCCCTATTC |
| C4H3 | Unigene0125244 | GAAGTTCGGCGATATCCTTCTC  | CAAATTCGACTCCCTGGGTATG  |

|         |                |                         |                          |
|---------|----------------|-------------------------|--------------------------|
| 4CL1    | Unigene0112398 | TAGAGAGGGACTTGATGGAGAG  | CCCTCCGAAATCCTCAAACA     |
| 4CL2    | Unigene0118305 | CCAGGATGGGTCGATAGAATTT  | GCTGGTCTACGTGGTTGATAG    |
| 4CL3    | Unigene0015559 | CATCATCACCCACTCCATCTT   | TGAACGGAAGGCAGGATTT      |
| 4CL4    | Unigene0131993 | AGTGAGGACTACTCCCTTAACC  | ATTCGCCTCTCCCTCCATTA     |
| CHS1    | Unigene0150238 | GCTCGTGGTGCAGAATATGA    | AGGCAAGAGGTTCGCAATAAG    |
| CHS2    | Unigene0076676 | GTAGGCGAGTGAGTTGGTAATC  | CCAGACGAGCCATCAAAGAA     |
| CHS3    | Unigene0134375 | GCTGGTGGTGCAGAAGATTA    | CAAGACATAGTGGTCACCGAAG   |
| CHI1    | Unigene0116452 | GGCTCACAATATGGCGTACA    | GTGCTTCTTCTTCCTCCTCTTC   |
| CHI2    | Unigene0116451 | GTGCTTCTTCTTCCTCCTCTTC  | GGCTCACAATATGGCGTACA     |
| DFR1    | Unigene0104804 | CAGCCCTCAGCTCTATTTCTAC  | CGAGGATGTTCCGGCTTATT     |
| DFR2    | Unigene0157250 | GAGTGAAGACCATCCCAAGTT   | CGTCCATAGGTTTGAGGAAGAG   |
| DFR3    | Unigene0149794 | CGAGAGAGATAGAGAGAGAGATG | TGTTCCGTTGACCTTGTATCC    |
| DFR4    | Unigene0022383 | GAGATAGCAGCAAGAGAGAATGG | TCACAAGCCAGGAAGCAATAA    |
| F3H1    | Unigene0124945 | GAGTACAGCGCCAAGCTAAT    | CGACCAATTTCTGGTCCATTTT   |
| F3H2    | Unigene0109511 | TCAACGACCACAACCTCATTCA  | CTTCTCTCCTCTTCCGACAAATC  |
| F3'H1   | Unigene0142709 | TACTCGCAGAAATGGGCTTTAG  | CTTGAGCAGAGGAAGGTTAG     |
| F3'H2   | Unigene0127406 | CCGGAAGGCTAATGTCTCATC   | GACGGCTACCTCATTCTAAAG    |
| F3'5'H1 | Unigene0103961 | GGGCTTCATCTCTGACCTATTC  | GTCGGAGGATTGATGGGTTT     |
| F3'5'H2 | Unigene0138824 | CTGAATCCGCACAAGAGTTAAAG | GGAGCCAAGAAAGGGAAGAA     |
| F3'5'H3 | Unigene0147368 | CCGGCGATTAGATCCTGTATTAT | GTTGACGTCTCCTTCAGTT      |
| FLS1    | Unigene0157397 | AATCAACCCAGGCCTTCTTC    | TCGCAGGAGGAGAAGGATAA     |
| FLS2    | Unigene0109511 | AGCTTAGGGCTCGATGAAAG    | GGAGTATCCGAATGAGCAGATAG  |
| ANS     | Unigene0101519 | CTCCTTACTCTCTCTCGGTCTC  | CAGCGTGGGTAGTAGTTGATTT   |
| UFGT1   | Unigene0142333 | TCTTCCGGCCTCGTACTATT    | GGTGACCTGGCCGTTATTT      |
| UFGT2   | Unigene0117481 | GGGTTCCCGTTAGCGTTATT    | GGAGTTTGTGAGCATGAGTAGG   |
| MYB1    | Unigene0012491 | GGCTTCTCGGATGAAGAAGATAG | CAGGAAGATGCGCAGCTATAA    |
| MYB2    | Unigene0101304 | AGGCTCAGGTGGACAAATTAC   | TGTTACCAAGCAGAGCATGAA    |
| MYB3    | Unigene0116668 | CTGTTCCCTCCTGCATGCTAAA  | CCTAACAAAGCTGGCCTACAA    |
| MYB4    | Unigene0135347 | CTGCAGGCTTAGGTGGATAAA   | CTGAGACCATCTGTTTCCAAGA   |
| MYB5    | Unigene0155688 | AGAACTCCATGCTGTGATAAAG  | CCACCTGTTCCATACTTCTCTATG |
| Actin   | JX294908       | TCCCAAGGCAAACAGAGAAA    | GGCCACTAGCATATAGGGAAAG   |

*D. officinale* actin (GenBank accession no. JX294908) was obtained from NCBI. Primer Premier 5.0 software (Premier Biosoft International, Palo Alto, CA, USA) was used to design primers for this study.

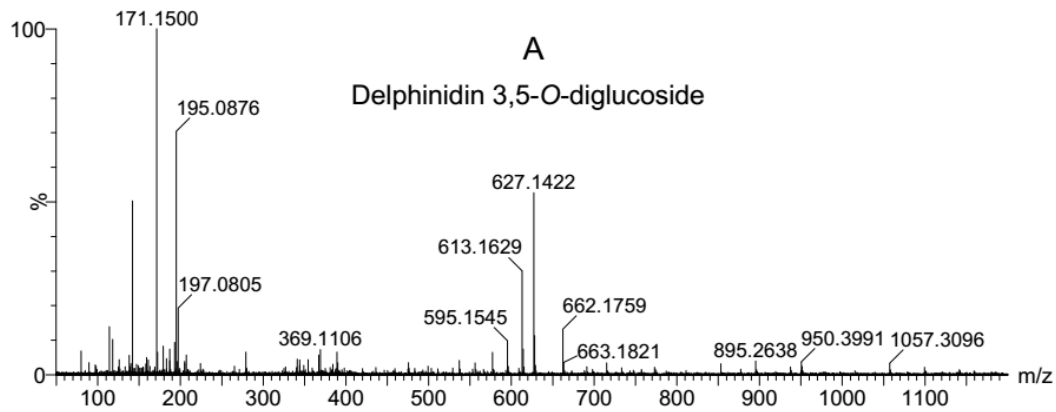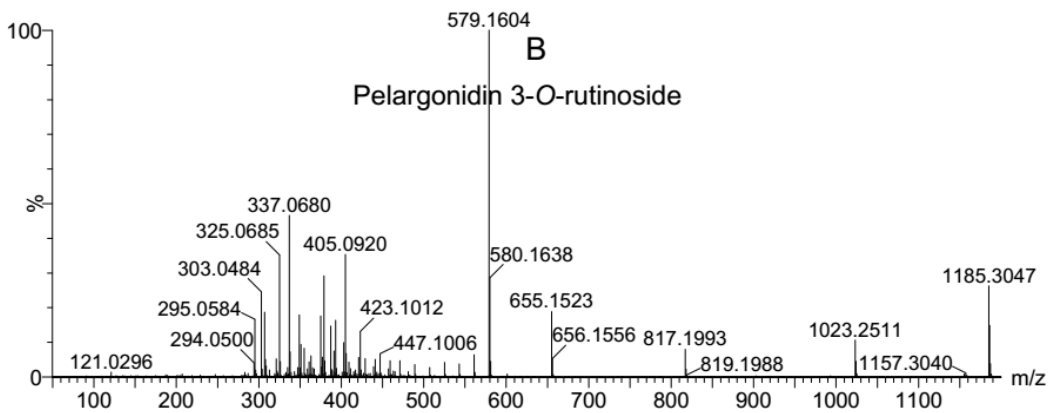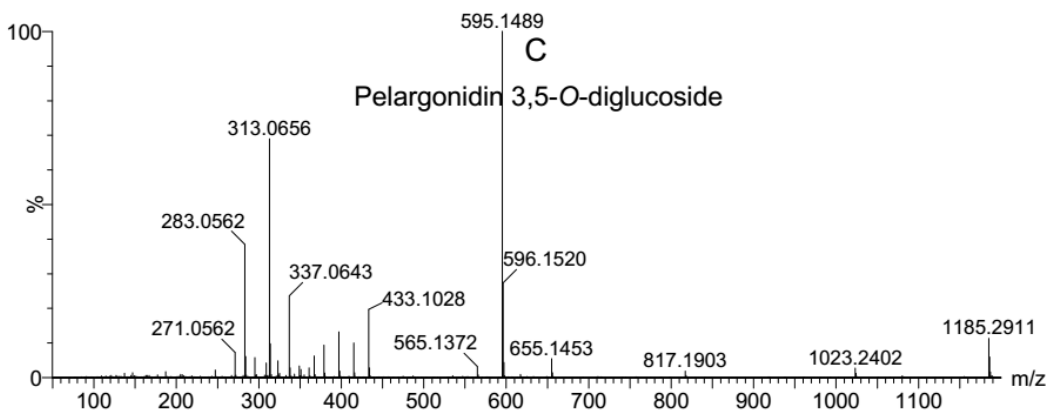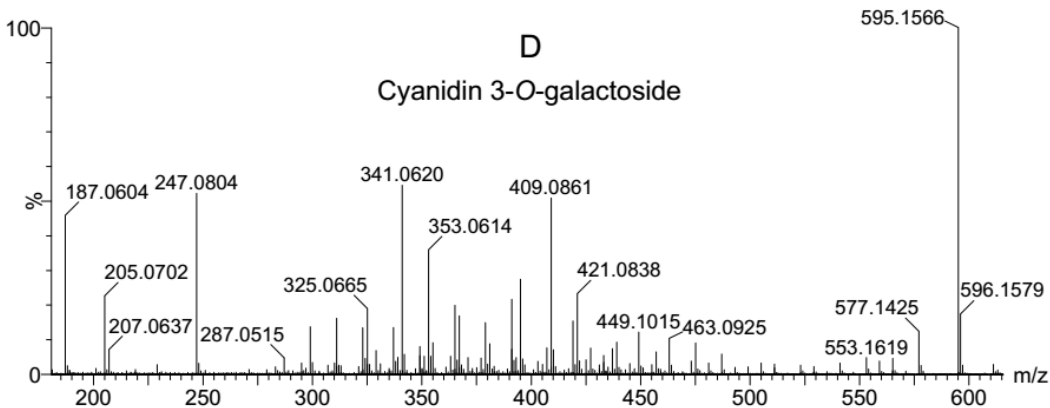

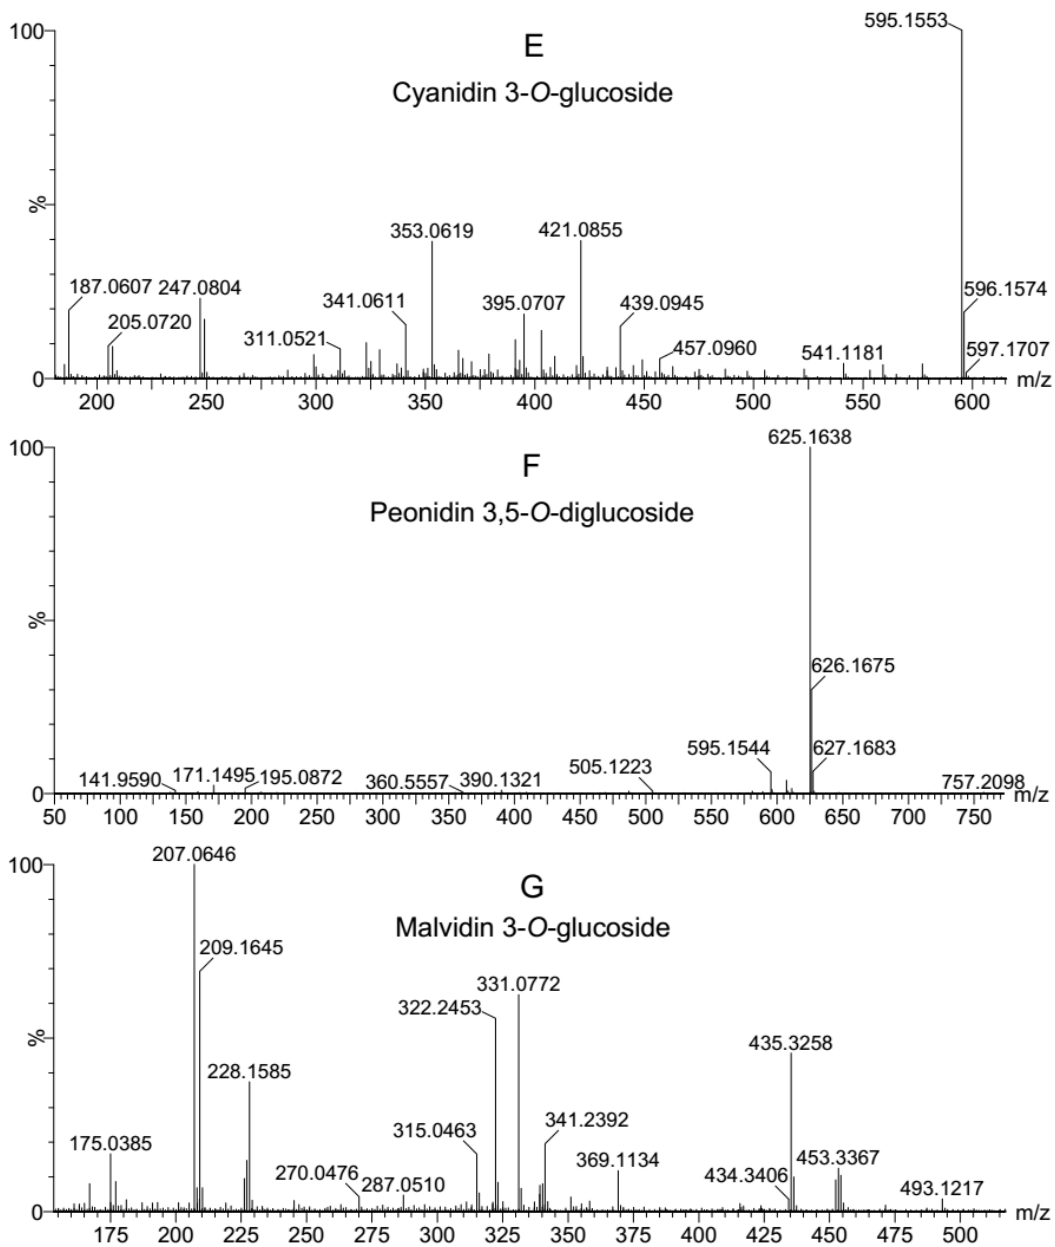

**Figure S1** UPLC-ESI/MS/MS of anthocyanins in the peels of pooled *D. officinale* green and red stems. Precursor-ion analysis of (A) delphinidin 3,5-*O*-diglucoside; (B) pelargonidin 3-*O*-rutinoside; (C) pelargonidin 3,5-*O*-diglucoside; (D) cyanidin 3-*O*-galactoside; (E) cyanidin 3-*O*-glucoside; (F) peonidin 3,5-*O*-diglucoside; (G) malvidin 3-*O*-glucoside.

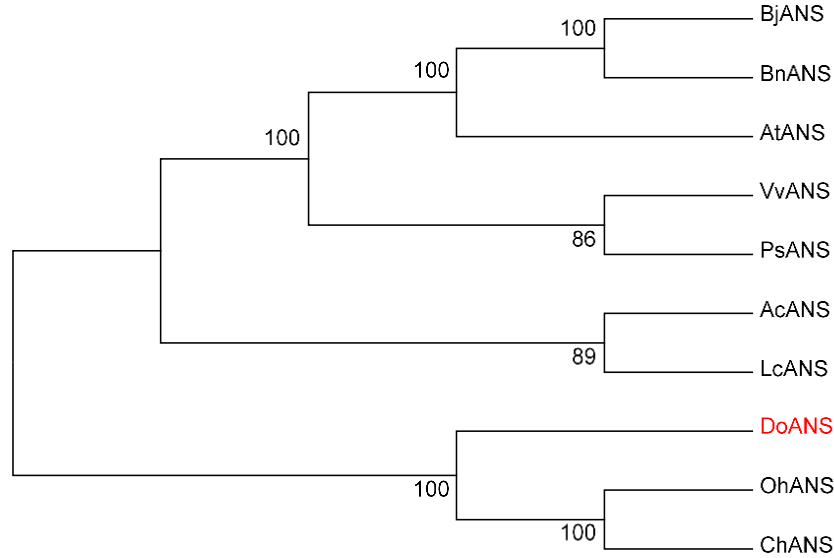

**Figure S2** Phylogenetic analysis of *D. officinale* DoANS with reported ANSs from other plants. Neighbor-joining phylogenetic analysis was conducted using MEGA5.0 with 1000 bootstrap replicates. ANS proteins used for phylogenetic profiling alignment are: AcANS (*Allium cepa*, EF192475), AtANS (*Arabidopsis thaliana*, JF681791), BjANS (*Brassica juncea*, EU927147), BnANS (*Brassica napus*, KF250411), ChANS (*Cymbidium dayanum*, KM186177), LcANS (*Lycoris chinensis*, KC131464), OhANS (*Oncidium hybridum*, EF570114), PsANS (*Prunus salicina*, JN560957) and VvANS (*Vitis vinifera*, EU156063).

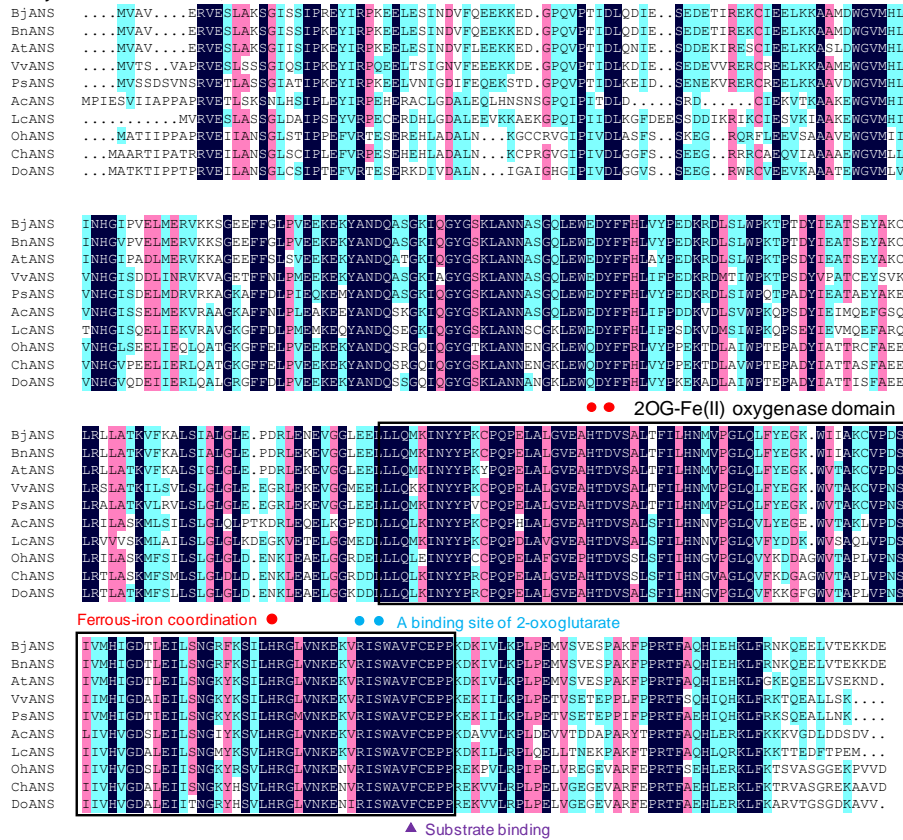

**Figure S3** Sequence alignment of *D. officinale* DoANS with known ANSs from other plants using ClustalX

multiple alignment tool. Residues framed in a rectangle are postulated to be the 2OG-Fe(II) oxygenase domain. Red circles indicate residues for ferrous-iron coordination. Blue circles indicate residues for a binding site of 2-oxoglutarate. Purple arrow-head indicates residue for substrate binding. ANS proteins used for phylogenetic profiling alignment are: AcANS (*Allium cepa*, EF192475), AtANS (*Arabidopsis thaliana*, JF681791), BjANS (*Brassica juncea*, EU927147), BnANS (*Brassica napus*, KF250411), ChANS (*Cymbidium dayanum*, KM186177), LcANS (*Lycoris chinensis*, KC131464), OhANS (*Oncidium hybridum*, EF570114), PsANS (*Prunus salicina*, JN560957) and VvANS (*Vitis vinifera*, EU156063).

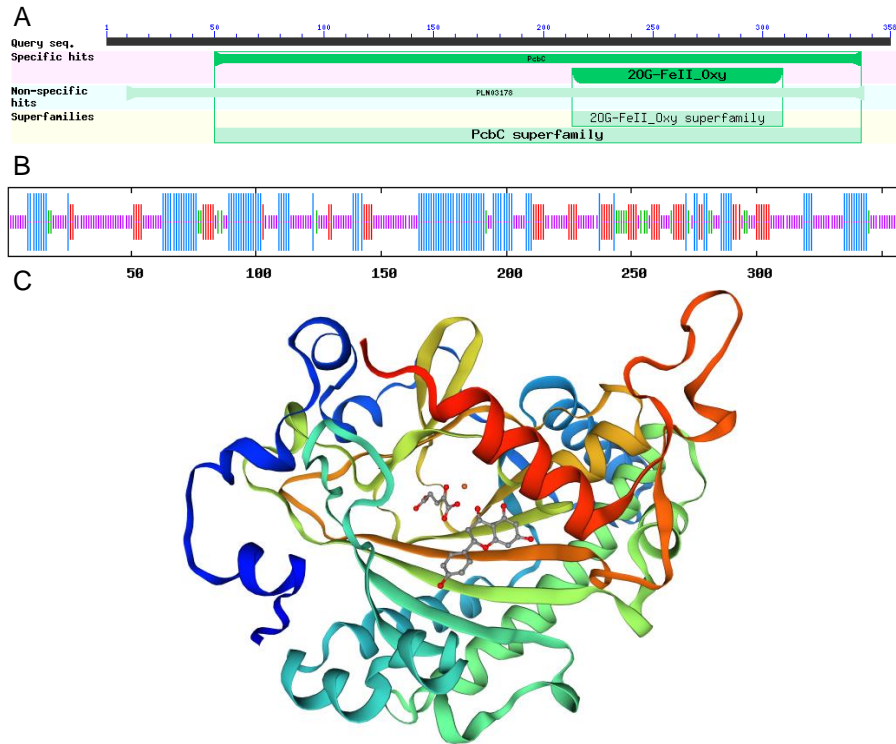

**Figure S4** The structural characteristics of *D. officinale* anthocyanin synthase (DoANS). (A) Conserved functional domain annotation; (B) Secondary protein structure of DoANS:  $\alpha$ -helix, extended strand and random coil are represented by the longest, second longest and shortest vertical bars, respectively; (C) Tertiary structure of the characteristic functional region, showing the OG-Fe(II) oxygenase domain in the form of a carbon frame.

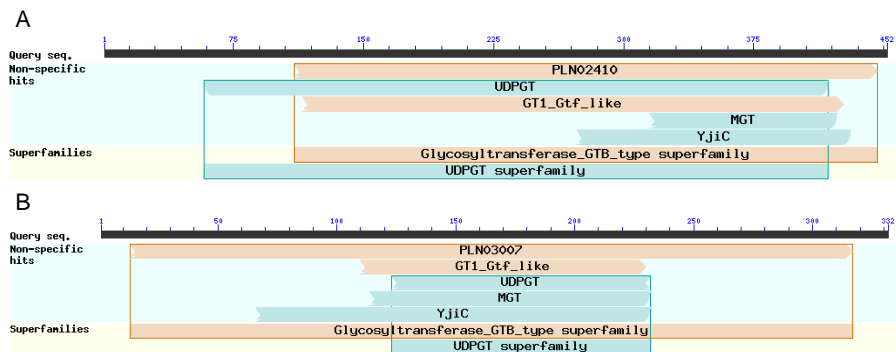

**Figure S5** Conserved functional domain of UDP-glucose flavonoid 3-O-glucosyl transferase proteins in *D. officinale*. (A) Conserved domain annotation of DoUFGT1; (B) Conserved domain annotation of DoUFGT2.

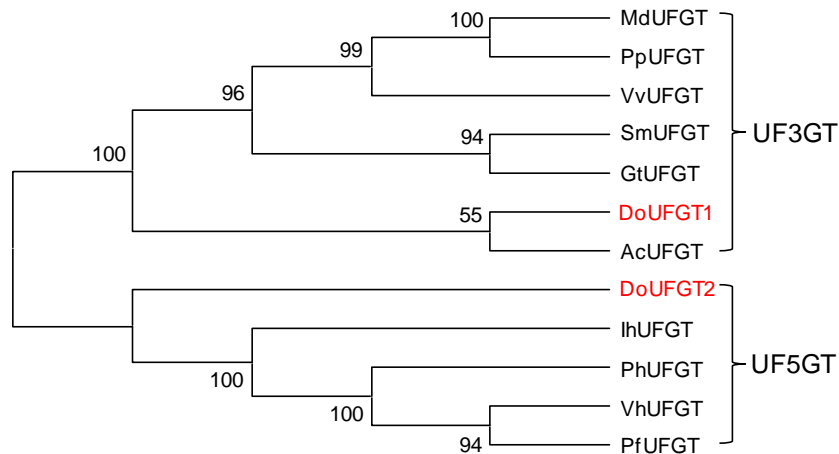

**Figure S6** Sequence alignment of *D. officinale* DoUFGT1 and DoUFGT2 with known UFGTs from other plants using ClustalX multiple sequence alignment tool. UF3GT indicates glucosylation of the anthocyanidins at the 3-*O*-position, while UF5GT indicates glucosylation of the anthocyanidins at the 5-*O*-position. UFGT proteins used for phylogenetic profiling alignment are: AcUFGT (*Allium cepa*, KY273099); GtUFGT (*Gentiana triflora*, Q96493); IhUFGT (*Iris hollandica*, AB113664); MdUFGT (*Malus domestica*, AF117267); PpUFGT (*Prunus persica*, JX149550); SmUFGT (*Solanum melongena*, Q43641); VhUFGT (*Verbena hybrida*, AB013598); VvUFGT (*Vitis vinifera*, DQ513314).

## References

1. Wrolstad, R.E.; Putnam, T.P.; Varseveld, G.W. Color quality of frozen strawberries: effect of anthocyanin, pH, total acidity and ascorbic acid variability. *J Food Sci* **1970**, *35*, 448-452.
2. Lichtenthaler, H.K.; Wellburn, A.R. Determinations of total carotenoids and chlorophylls A and B of leaf extracts in different solvents. *Biochem Soc Trans* **1983**, *11*, 591-592.
3. Fu, X.M.; Cheng, S.H.; Liao, Y.Y.; Huang, B.Z.; Du, B.; Zeng, W.; Jiang, Y.M.; Duan, X.W.; Yang, Z.Y. Comparative analysis of pigments in red and yellow banana fruit. *Food Chem* **2018**, *239*, 1009-1018.
